# Supplementary material
Source: PubMed Central journal article supplement (PMC4789903)
Supplement: brc-0010-0364-s01.pdf [file brc-0010-0364-s01.pdf]

**Supplemental Table 1.** Publications on breast cancer according to topic, design, and region with 2012 population indicated

|                                            | Total                   | Region                  |                        |                        |                           |                           |                      |
|--------------------------------------------|-------------------------|-------------------------|------------------------|------------------------|---------------------------|---------------------------|----------------------|
|                                            |                         | North Africa<br>207 Mio | West Africa<br>320 Mio | East Africa<br>352 Mio | Central Africa<br>133 Mio | Southern Africa<br>58 Mio | More than one Region |
| Mean number of patients included (min-max) | 205<br>(0-6,291)        | 341<br>(1-6,291)        | 127<br>(1-2,154)       | 123<br>(1-384)         | 185<br>(5-531)            | 136<br>(1-962)            | 171<br>(1-1,028)     |
|                                            | Total n<br>(% of total) | n                       |                        |                        |                           |                           |                      |
| Type of therapy*                           |                         |                         |                        |                        |                           |                           |                      |
| Surgery                                    | 153 (70)                | 57                      | 51                     | 15                     | 3                         | 23                        | 4                    |
| Chemotherapy                               | 132 (60)                | 45                      | 43                     | 12                     | 5                         | 24                        | 3                    |
| Radiotherapy                               | 101 (46)                | 44                      | 22                     | 11                     | 4                         | 17                        | 3                    |
| Endocrine therapy                          | 84 (38)                 | 33                      | 20                     | 8                      | 4                         | 16                        | 3                    |
| Targeted therapy                           | 4 (2)                   | 2                       | 0                      | 1                      | 0                         | 1                         | 0                    |
| Combination                                | 128 (58)                | 47                      | 39                     | 12                     | 4                         | 23                        | 3                    |
| Unknown therapy                            | 18 (8)                  | 3                       | 8                      | 2                      | 0                         | 4                         | 1                    |
| Type of study design                       |                         |                         |                        |                        |                           |                           |                      |
| Randomized controlled trial                | 20 (9)                  | 4                       | 1                      | 0                      | 0                         | 15                        | 0                    |
| Non-randomized controlled trial            | 18 (8)                  | 5                       | 4                      | 4                      | 0                         | 5                         | 0                    |
| Non-randomized non-controlled              | 18 (8)                  | 12                      | 3                      | 2                      | 0                         | 1                         | 0                    |
| Review                                     | 12 (5)                  | 3                       | 4                      | 1                      | 0                         | 2                         | 2                    |
| Case-control study                         | 4 (2)                   | 3                       | 0                      | 0                      | 0                         | 1                         | 0                    |
| Cohort study                               | 6 (3)                   | 4                       | 0                      | 0                      | 0                         | 2                         | 0                    |
| Cross-sectional study                      | 12 (5)                  | 2                       | 5                      | 2                      | 2                         | 0                         | 1                    |
| Descriptive study                          | 95 (43)                 | 36                      | 38                     | 7                      | 3                         | 10                        | 1                    |
| Case report                                | 17 (8)                  | 4                       | 10                     | 1                      | 1                         | 1                         | 0                    |
| Expert opinion                             | 17 (8)                  | 2                       | 6                      | 2                      | 0                         | 5                         | 2                    |
| Meta-analysis                              | 23 (11)                 | 14                      | 1                      | 4                      | 0                         | 4                         | 0                    |
| Included                                   |                         |                         |                        |                        |                           |                           |                      |
| Follow-up                                  | 38 (17)                 | 12                      | 16                     | 1                      | 1                         | 8                         | 0                    |
| Median survival                            | 62 (28)                 | 24                      | 13                     | 2                      | 2                         | 20                        | 1                    |
| Mortality                                  | 17 (8)                  | 4                       | 7                      | 0                      | 1                         | 5                         | 0                    |
| Influence of therapy                       | 117 (53)                | 43                      | 34                     | 15                     | 3                         | 22                        | 0                    |
| Toxicities/Side effects                    | 46 (21)                 | 21                      | 10                     | 1                      | 0                         | 14                        | 0                    |
| Effectiveness/Efficacy                     | 65 (30)                 | 28                      | 16                     | 4                      | 0                         | 17                        | 0                    |
| Grade of evidence                          |                         |                         |                        |                        |                           |                           |                      |
| LoE 1                                      | 2 (1)                   | 0                       | 0                      | 1                      | 0                         | 1                         | 0                    |
| LoE 2                                      | 20 (9)                  | 4                       | 1                      | 0                      | 0                         | 15                        | 0                    |
| LoE 3                                      | 17 (8)                  | 5                       | 4                      | 4                      | 0                         | 4                         | 0                    |
| LoE 4                                      | 158 (72)                | 64                      | 57                     | 12                     | 6                         | 15                        | 4                    |
| LoE 5                                      | 22 (10)                 | 2                       | 9                      | 2                      | 0                         | 7                         | 2                    |

\*Some articles describe more than one therapy modality.
